# Supplementary material
Source: publisher site journal article supplement (https://www.dovepress.com/article/422513)
Supplement: Supplementary file 1 [file get_supplementary_file.php]

**Supplementary Table 1:** Patient follow up across AI Workflow encounters, Human Workflow encounters, and AI-Human Hybrid Workflow encounters. Fold difference is relative to the rate of follow up from all patients indicated for referral under the Human Workflow.

|  | **Total  Patients (N)** | **Followed Up**  **(N)** | **Percent Follow up** | **Fold Difference** |
| --- | --- | --- | --- | --- |
| AI Workflow | 279 | 99 | 35.5% | 3.0 |
|  |  |  |  |  |
| AI-Human Hybrid Workflow (human-MTMDR) | 20 | 1 | 5.0% | 0.4 |
| AI-Human Hybrid Workflow (human-ungradable) | 83 | 11 | 13.3% | 1.1 |
| Combined AI-Human Hybrid Workflow | 103 | 12 | 11.6% | 1.0 |
|  |  |  |  |  |
| Human Workflow (MTMDR) | 40 | 8 | 20.0% | 1.7 |
| Human Workflow (Ungradable) | 77 | 6 | 7.8% | 0.6 |
| Combined Human Workflow | 117 | 14 | 12.0% | **1.0** |

**Supplementary Table 2.** Odds ratio of following up with an ophthalmologist following an ungradable or MTMDR result relative to those who did not follow up, across several demographic and health factors. Odds ratios represent the likelihood of following up with an ophthalmologist after a referrable result.

| **Variable** | **Odds Ratio** | **95% CI** | **p-value** |
| --- | --- | --- | --- |
| Female | 0.57 | 0.22 - 1.50 | 0.25 |
| Age > 60 | 1.26 | 0.47 - 3.34 | 0.64 |
| Obesity | 0.75 | 0.28 - 1.96 | 0.55 |
| Smoker | 0.77 | 0.27 - 2.24 | 0.64 |

**Supplementary Table 3.** Comparison of demographic and health variables between patients who followed up with an ophthalmologist following an ungradable or MTMDR diagnosis compared to those who did not follow up. Continuous variables were compared using two-tailed students t-test.

| **Variable** | **Patients who followed up  (n = 68)** | **Patients who did not follow up (n = 25)** | **p-value** |
| --- | --- | --- | --- |
| Median Age | 55 | 56 | 0.68 |
| Female gender (self-reported) | 52.3% | 37.5% | 0.22 |
| Hemoglobin A1c | 7.8 | 10.1 | 0.14 |
| Blood glucose | 140 | 159 | 0.32 |
| BMI | 29.2 | 29.8 | 0.99 |
| Smoker | 34.8% | 30.4% | 0.67 |

**Supplemental Material 1: Patient Follow-Up Survey**

**Did you have a follow-up visit with an ophthalmologist after you were referred due to the results of the initial eye screening at a primary care site?**

- Yes
- No
- Did not pick up

**Proceed, If the patient had a follow-up visit:**

Where was your follow-up visit conducted? (Practice name, Doctor name, Location/City)

Was this your first time at this location or is this your usual eye care provider?

Why did you choose to go to this eye doctor?

- The distance to the site was convenient for me.
- This site had an appointment that worked with my schedule.
- I have been to this site before.
- I have heard this site is reputable from providers/family/friends.
- It's in my insurance network.
- I was referred here by my PCP.

How frequently do you see this doctor?

If you went to a new provider, why did you switch?

When was your last eye exam before that one?

Did they give you a diagnosis?

- Yes, diabetic retinopathy
- Yes, no diabetic retinopathy
- No, they didn’t tell me/I’m not sure

**Proceed, if the patient was diagnosed with diabetic retinopathy:**

What stage was the diagnosis?

- Mild
- Moderate
- Severe
- Proliferative
- I don’t know

What was the recommended treatment?

- Intraocular injection
- Retinal laser

**Proceed, if the patient did not have a follow-up visit:**

What factors prevented you from going to an in-person follow-up appointment with an ophthalmologist?

- Distance
- Knowledge Gap
- Scheduling
- Economic barriers
- Prioritization
- Fear
- Indifference

I wanted to offer you a diabetic eye examination at the Byers Eye Institute of Stanford University. Would you be interested in our scheduler contacting you to arrange an appointment?

- Yes
- No

Do you have other eye conditions that you follow up with an eye doctor for?

- Yes, an ophthalmologist
- Yes, an optometrist
- No

What issues do you see the other eye doctor for?

- Eyeglasses/contact lenses
- Glaucoma
- Dry eyes
- Macular degeneration
- Rather not say

Did they check your eyes for diabetes? (If “I don’t know”, did they dilate your eyes?)

- Yes
- No
- I don’t know
